# Supplementary material for: Accurate Sequence-Based Prediction of Deleterious nsSNPs with Multiple Sequence Profiles and Putative Binding Residues
Source: MDPI journal article supplement (doi:10.3390/biom11091337), 2021-09-09
Supplement: s1 [file s1]

## Supplementary Materials

### Accurate sequence-based prediction of deleterious nsSNPs with multiple sequence profiles and putative binding residues

Ruiyang Song <sup>1†</sup>, Baixin Cao <sup>1†</sup>, Zhenling Peng <sup>2</sup>, Christopher J Oldfield <sup>3</sup>, Lukasz Kurgan <sup>3, \*</sup>, Ka-Chun Wong <sup>4</sup>, and Jianyi Yang <sup>1, \*</sup>

**Table S1.** Accuracy, Area Under the ROC Curve (AUC), Matthews correlation coefficient (MCC), True Positive Rate (TPR), and False Negative Rate (FPR) of six machine learning algorithms on the four benchmark datasets.

| Methods          | Accuracy |        |        |        | AUC    |        |        |        | MCC    |        |        |        | TPR    |        |        |        | FPR    |        |        |        |
|------------------|----------|--------|--------|--------|--------|--------|--------|--------|--------|--------|--------|--------|--------|--------|--------|--------|--------|--------|--------|--------|
|                  | HumVar   | HumDiv | SNPdbe | ExoVar | HumVar | HumDiv | SNPdbe | ExoVar | HumVar | HumDiv | SNPdbe | ExoVar | HumVar | HumDiv | SNPdbe | ExoVar | HumVar | HumDiv | SNPdbe | ExoVar |
| MLP <sup>1</sup> | 0.7853   | 0.8608 | 0.8440 | 0.8102 | 0.8475 | 0.9203 | 0.7167 | 0.8594 | 0.5708 | 0.7149 | 0.3015 | 0.6104 | 0.7742 | 0.8008 | 0.9019 | 0.8233 | 0.2036 | 0.0941 | 0.5831 | 0.2089 |
| NB <sup>2</sup>  | 0.7730   | 0.8725 | 0.5451 | 0.8102 | 0.8488 | 0.9243 | 0.8108 | 0.8837 | 0.5531 | 0.7420 | 0.2377 | 0.6030 | 0.8514 | 0.8756 | 0.5020 | 0.8739 | 0.3049 | 0.1298 | 0.1368 | 0.2824 |
| LR <sup>3</sup>  | 0.8204   | 0.8952 | 0.8957 | 0.8763 | 0.8924 | 0.9543 | 0.8757 | 0.9306 | 0.6421 | 0.7871 | 0.3551 | 0.7431 | 0.8512 | 0.8923 | 0.9872 | 0.9034 | 0.2102 | 0.1027 | 0.7785 | 0.1631 |
| Ada <sup>4</sup> | 0.8410   | 0.9127 | 0.9447 | 0.8968 | 0.9137 | 0.9689 | 0.9560 | 0.9581 | 0.682  | 0.8219 | 0.7264 | 0.7853 | 0.8472 | 0.8991 | 0.9757 | 0.9339 | 0.1652 | 0.0771 | 0.2834 | 0.1571 |
| XGB <sup>5</sup> | 0.8562   | 0.9229 | 0.9502 | 0.9085 | 0.9292 | 0.9746 | 0.9739 | 0.9690 | 0.7123 | 0.8428 | 0.7514 | 0.8098 | 0.8572 | 0.9121 | 0.9806 | 0.9464 | 0.1449 | 0.0689 | 0.2736 | 0.1466 |
| RF <sup>6</sup>  | 0.8815   | 0.9279 | 0.9518 | 0.9113 | 0.9481 | 0.9771 | 0.9722 | 0.9700 | 0.7630 | 0.8527 | 0.7528 | 0.8159 | 0.8780 | 0.9051 | 0.9890 | 0.9507 | 0.1150 | 0.0549 | 0.3225 | 0.1459 |

<sup>1</sup>Multilayer Perceptron (MLP); <sup>2</sup>Naïve Bayes (NB); <sup>3</sup>Logistic Regression (LR); <sup>4</sup>Adaptive Boosting (Ada); <sup>5</sup>eXtreme Gradient Boosting (XGB); <sup>6</sup>Random Forests (RF, also as the DMBS predictor).

We implement the above algorithms based on the scikit-learn package with their default parameters [1].

**Table S2.** Assessment of the statistical significance of the differences between AUC values produced by DMBS and AUCs of several other predictors including two DMBS variants, DMBS\_MSA and DMBS\_BR (described in Section 3.3 in the main text), and SNPdryad on the four benchmark datasets (HumDiv, HumVar, SNPdbe and ExoVar). The table lists  $p$ -values that were computed using student's  $t$ -tests.

| Method   | HumDiv   | HumVar   | SNPdbe   | ExoVar   |
|----------|----------|----------|----------|----------|
| DMBS_MSA | 8.47E-12 | 9.72E-50 | 8.05E-20 | 9.14E-23 |
| DMBS_BR  | 4.05E-74 | 2.65E-70 | 0.02     | 2.07E-13 |
| SNPdryad | 1        | 2.12E-75 | --       | --       |

## References

1. Pedregosa F, Varoquaux G, Gramfort A et al. Scikit-learn: Machine Learning in Python, Journal of Machine Learning Research 2011;12:2825-2830.
